# Supplementary material
Source: publisher site journal article supplement (https://www.dovepress.com/article/319840)
Supplement: Supplementary file 1 [file get_supplementary_file.php]

Table S1.

Codes from DREAM database and which are treated as part of workforce and which are considered permanent detachment. Codes are from DREAM version 39.

| <b>Working</b>                          | <b>Unemployed</b>                                                                                                  |
|-----------------------------------------|--------------------------------------------------------------------------------------------------------------------|
| "" = part of the workforce              | "111-114 or 130-140 or 143-149" or<br>"151-153" or "211-218" or "231" or "299"<br>"720-739" = unemployment benefit |
| "121-123" = holiday benefits            | "124-126" = vacation benefit for<br>unemployed                                                                     |
| "412" = Leave of absence                | "700-719" unemployment benefit for<br>immigrants                                                                   |
| "413" = Educational leave of absence    | "750-768" Revalidation benefit                                                                                     |
| "511" = service job                     | <b>Sick Leave</b>                                                                                                  |
| "521" = Adult apprentice                | "810-818 or 870-878" = workforce<br>ability benefit                                                                |
| "522" = Rotation substitute             | 890-899" = sick leave                                                                                              |
| "651-652" = State educational support   | <b>Early retirement</b>                                                                                            |
| "661" = Adult state educational support | "740-748 or 771 or 774" = "Flex Job"                                                                               |
| "881" = Maternity leave                 | "781" = Sheltered job                                                                                              |
|                                         | "783" = Early retirement                                                                                           |

Benefit descriptions:

Holiday benefits = payment received during holiday while currently employed; leave of absence = Leave of absence from the workforce, Educational leave of absence = leave of absence from education system; "Service job, adult apprentice and rotation substitute = support requires employment; "State educational support and adult state educational support = payment received while studying; maternity leave = public support during maternity leave; Flex Job = benefit available to people with greatly impaired working ability who have work at greatly reduced time; sheltered job = only available to people receiving early retirement; unemployment benefit = benefit available to unemployed; vacation benefit unemployed = benefit available during vacation during unemployment; unemployment benefit for immigrants = unemployment benefit available to not Danish nationals; revalidation benefit = benefit available while being evaluated for potential reschooling with the prospect of full or partial return to work; workforce ability benefit= benefit requiring inability to work due to illness when being evaluated for work ability.

Table S2. Table with ICD-10 codes used to define amount of comorbidity and specific comorbidities.

| <b>DIAGNOSIS CODES</b>         | <b>ICD-10 codes</b>                                                                                        | <b>Medication (ATC-code)</b> |
|--------------------------------|------------------------------------------------------------------------------------------------------------|------------------------------|
| Ischemic heart disease         | I20, I21, I23-25                                                                                           |                              |
| Cardiac insufficiency          | I42 (excluding I428B), I43, I50, I099, I110, I130, I132, I255                                              |                              |
| Atrial fibrillation/flutter    | I48                                                                                                        |                              |
| Cerebrovascular disease        | I60-I69, G45, G46, H340                                                                                    |                              |
| Pulmonary fibrosis             | J84, J631, J633, J635, J628A, J638A, J638B, J701, J703                                                     |                              |
| Peptic ulcer                   | K25-K28, K221                                                                                              |                              |
| Diabetes                       | E101-E148                                                                                                  | A10                          |
| Chronic renal failure          | N032-N037, N052-N057, Z490-Z492, N18, N19, N26, I120, I131, I132, N250, Z940, Z992                         |                              |
| Cancers + lymphoma + leukaemia | C00-C26, C30-C33, C37-C41, C43, C45-C58, C60-C76, C77-C80, C81-C85, C88, C90-C97 (excluding C398 and C399) |                              |
| Pulmonary cancer               | C34, C398, C399                                                                                            |                              |
| Anxiety                        | F41                                                                                                        | N05B                         |
| Depression                     | F32                                                                                                        | N06A                         |

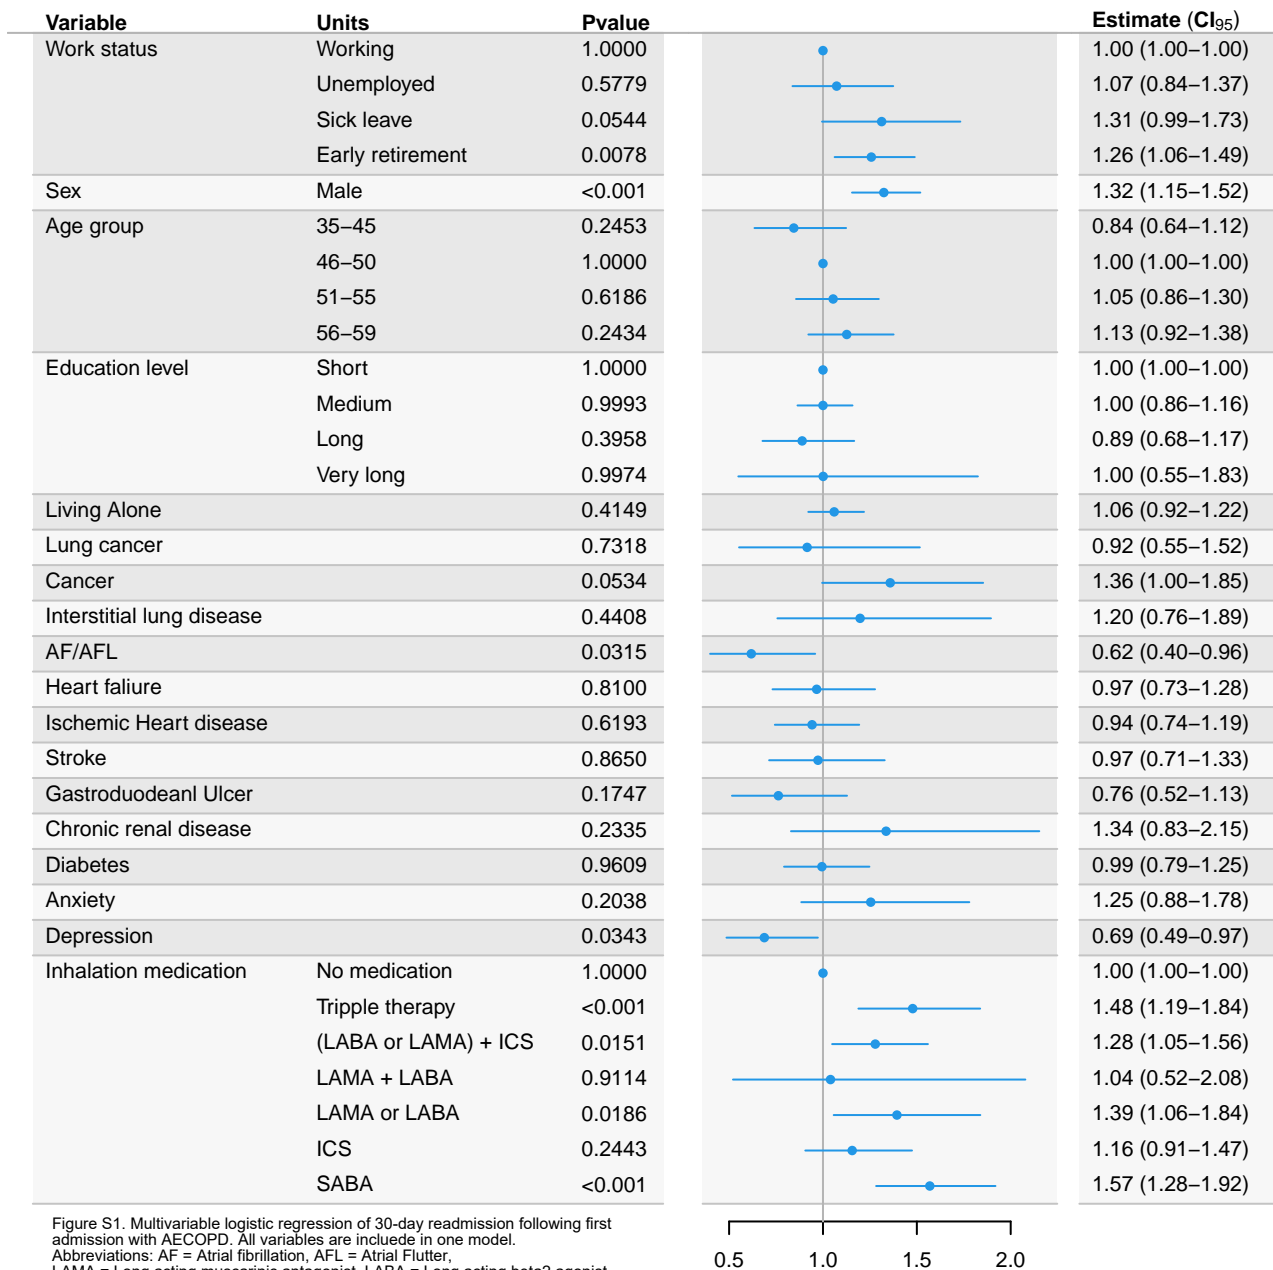

Figure S1. Multivariable logistic regression of 30-day readmission following first admission with AECOPD. All variables are include in one model. Abbreviations: AF = Atrial fibrillation, AFL = Atrial Flutter, LAMA = Long acting muscarinic antagonist, LABA = Long acting beta2 agonist, ICS = Inhaled corticosteroids, SABA = Short acting beta2 agonist

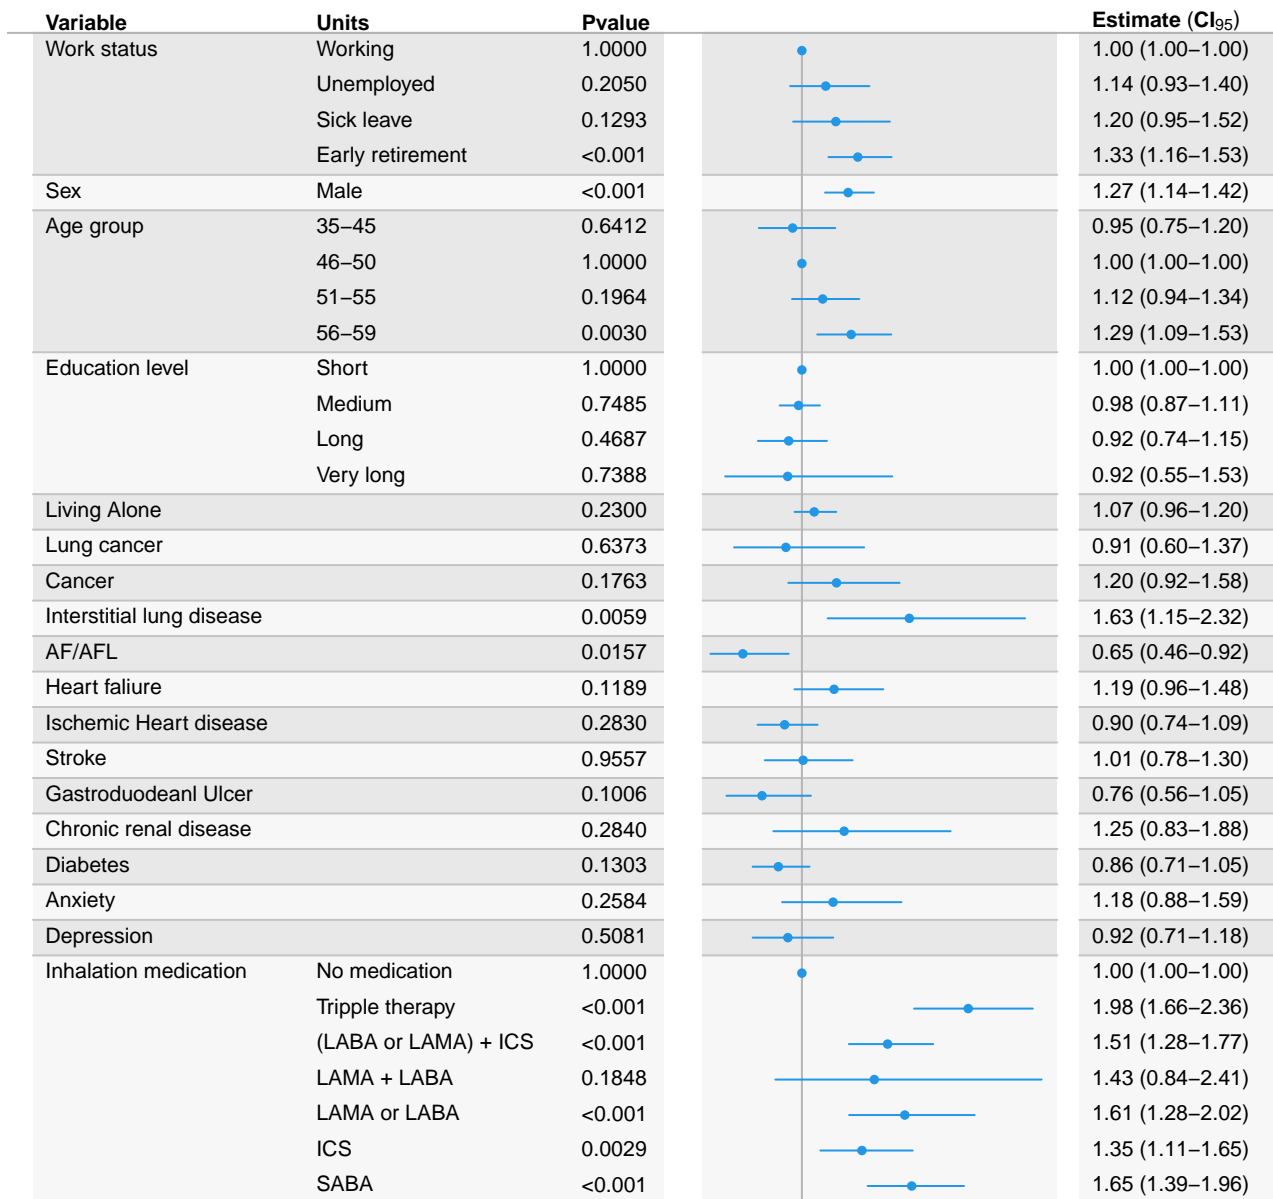

Figure S2. Multivariable logistic regression of 90-day readmission following first admission with AECOPD. All variables are included in one model. Abbreviations: AF = Atrial fibrillation, AFL = Atrial Flutter, LAMA = Long acting muscarinic antagonist, LABA = Long acting beta2 agonist, ICS = Inhaled corticosteroids, SABA = Short acting beta2 agonist

0.5 1.0 1.5 2.0 2.5

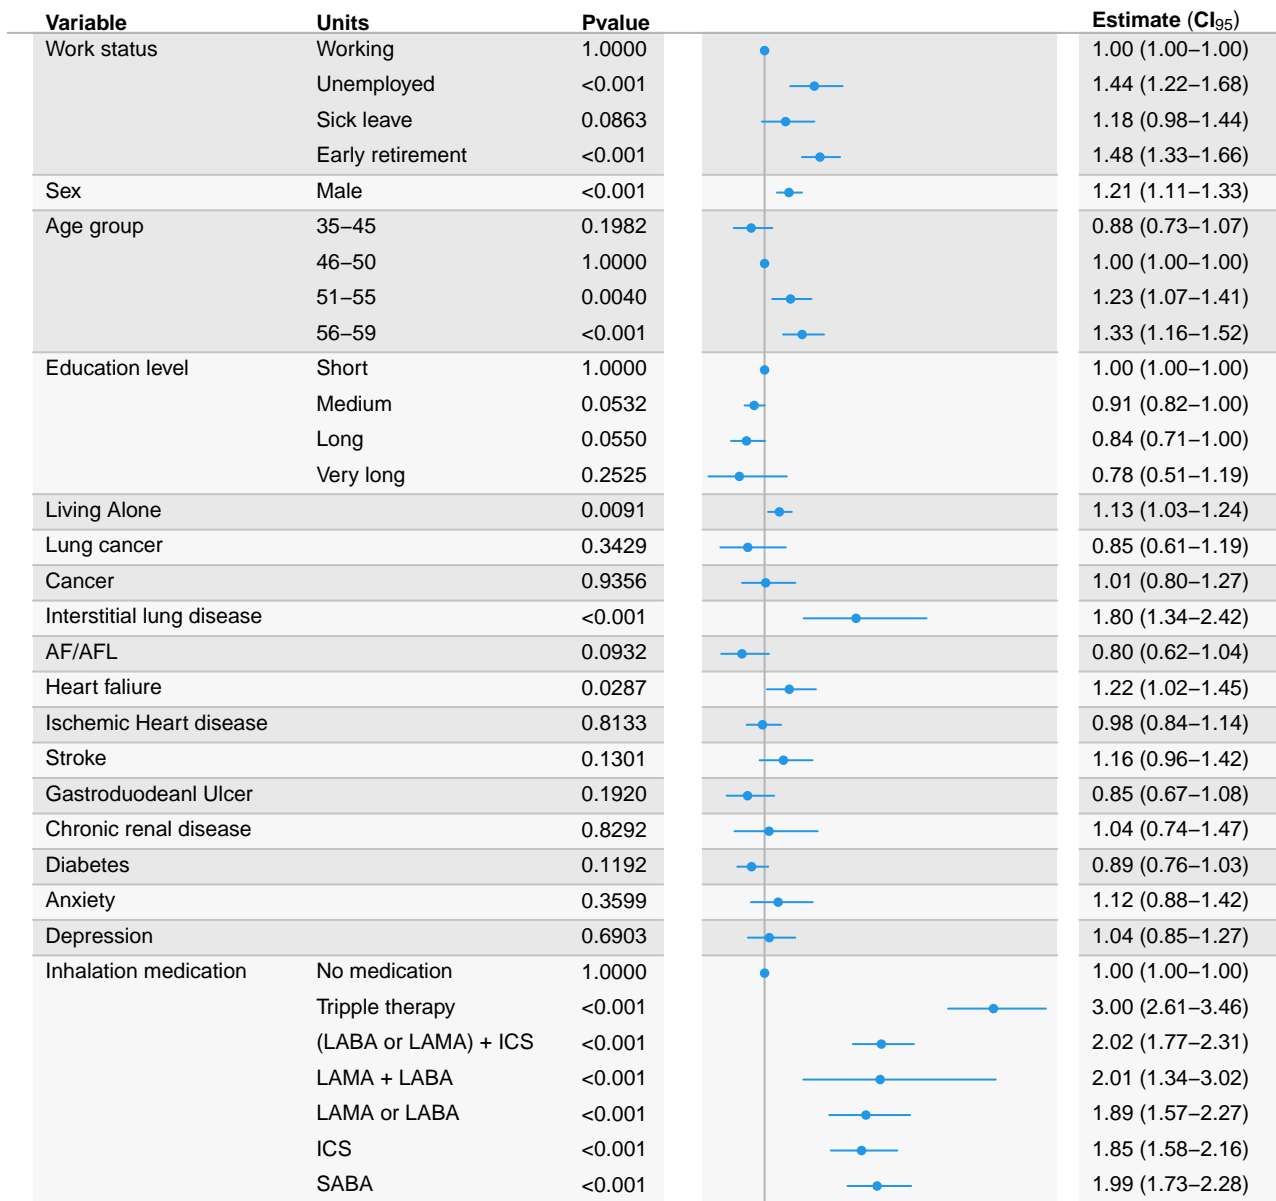

Figure S3. Multivariable logistic regression of 365-day readmission following first admission with AECOPD. All variables are included in one model. Abbreviations: AF = Atrial fibrillation, AFL = Atrial Flutter, LAMA = Long acting muscarinic antagonist, LABA = Long acting beta2 agonist, ICS = Inhaled corticosteroids, SABA = Short acting beta2 agonist

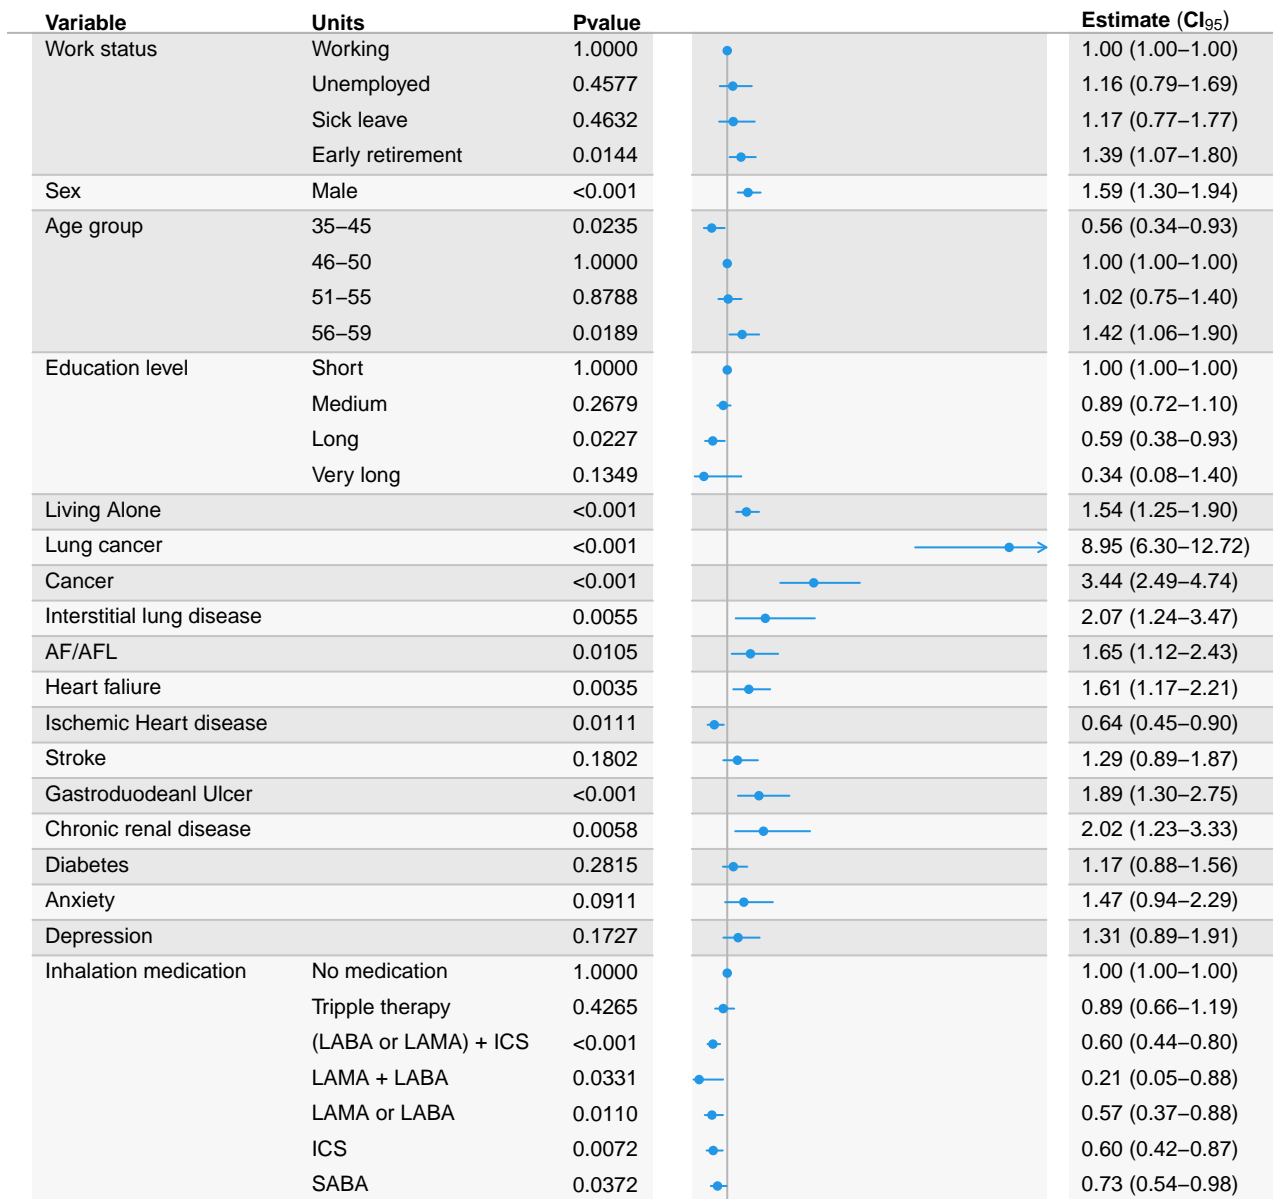

Figure S4. Multivariable logistic regression of 30-day mortality following first admission with AECOPD. All variables are included in one model. Abbreviations: AF = Atrial fibrillation, AFL = Atrial Flutter, LAMA = Long acting muscarinic antagonist, LABA = Long acting beta2 agonist, ICS = Inhaled corticosteroids, SABA = Short acting beta2 agonist

| Variable                  | Units                | Pvalue |  | Estimate (CI <sub>95</sub> ) |
|---------------------------|----------------------|--------|--|------------------------------|
| Work status               | Working              | 1.0000 |  | 1.00 (1.00–1.00)             |
|                           | Unemployed           | 0.9870 |  | 1.00 (0.71–1.40)             |
|                           | Sick leave           | 0.1487 |  | 1.29 (0.91–1.82)             |
|                           | Early retirement     | 0.0059 |  | 1.37 (1.09–1.70)             |
| Sex                       | Male                 | <0.001 |  | 1.55 (1.31–1.85)             |
| Age group                 | 35–45                | 0.0387 |  | 0.64 (0.42–0.98)             |
|                           | 46–50                | 1.0000 |  | 1.00 (1.00–1.00)             |
|                           | 51–55                | 0.7092 |  | 1.05 (0.80–1.38)             |
|                           | 56–59                | <0.001 |  | 1.59 (1.23–2.04)             |
| Education level           | Short                | 1.0000 |  | 1.00 (1.00–1.00)             |
|                           | Medium               | 0.2739 |  | 0.91 (0.76–1.08)             |
|                           | Long                 | 0.0032 |  | 0.55 (0.37–0.82)             |
|                           | Very long            | 0.0869 |  | 0.36 (0.11–1.16)             |
| Living Alone              |                      | <0.001 |  | 1.61 (1.35–1.93)             |
| Lung cancer               |                      | <0.001 |  | 10.36 (7.57–14.19)           |
| Cancer                    |                      | <0.001 |  | 3.49 (2.64–4.61)             |
| Interstitial lung disease |                      | 0.0095 |  | 1.85 (1.16–2.94)             |
| AF/AFL                    |                      | 0.0085 |  | 1.57 (1.12–2.20)             |
| Heart failiure            |                      | <0.001 |  | 1.87 (1.43–2.43)             |
| Ischemic Heart disease    |                      | 0.0190 |  | 0.71 (0.53–0.95)             |
| Stroke                    |                      | 0.1792 |  | 1.25 (0.90–1.72)             |
| Gastroduodeanl Ulcer      |                      | <0.001 |  | 1.85 (1.33–2.57)             |
| Chronic renal disease     |                      | <0.001 |  | 2.23 (1.46–3.42)             |
| Diabetes                  |                      | 0.3122 |  | 1.14 (0.89–1.46)             |
| Anxiety                   |                      | 0.0569 |  | 1.45 (0.99–2.13)             |
| Depression                |                      | 0.0737 |  | 1.35 (0.97–1.86)             |
| Inhalation medication     | No medication        | 1.0000 |  | 1.00 (1.00–1.00)             |
|                           | Tripple therapy      | 0.2999 |  | 0.87 (0.67–1.13)             |
|                           | (LABA or LAMA) + ICS | 0.0057 |  | 0.71 (0.56–0.90)             |
|                           | LAMA + LABA          | 0.0272 |  | 0.30 (0.10–0.87)             |
|                           | LAMA or LABA         | 0.0203 |  | 0.65 (0.45–0.94)             |
|                           | ICS                  | 0.0120 |  | 0.67 (0.50–0.92)             |
| SABA                      |                      | 0.0370 |  | 0.76 (0.59–0.98)             |

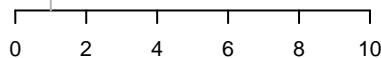

Figure S5. Multivariable logistic regression of 90-day mortality following first admission with AECOPD. All variables are included in one model. Abbreviations: AF = Atrial fibrillation, AFL = Atrial Flutter, LAMA = Long acting muscarinic antagonist, LABA = Long acting beta2 agonist, ICS = Inhaled corticosteroids, SABA = Short acting beta2 agonist

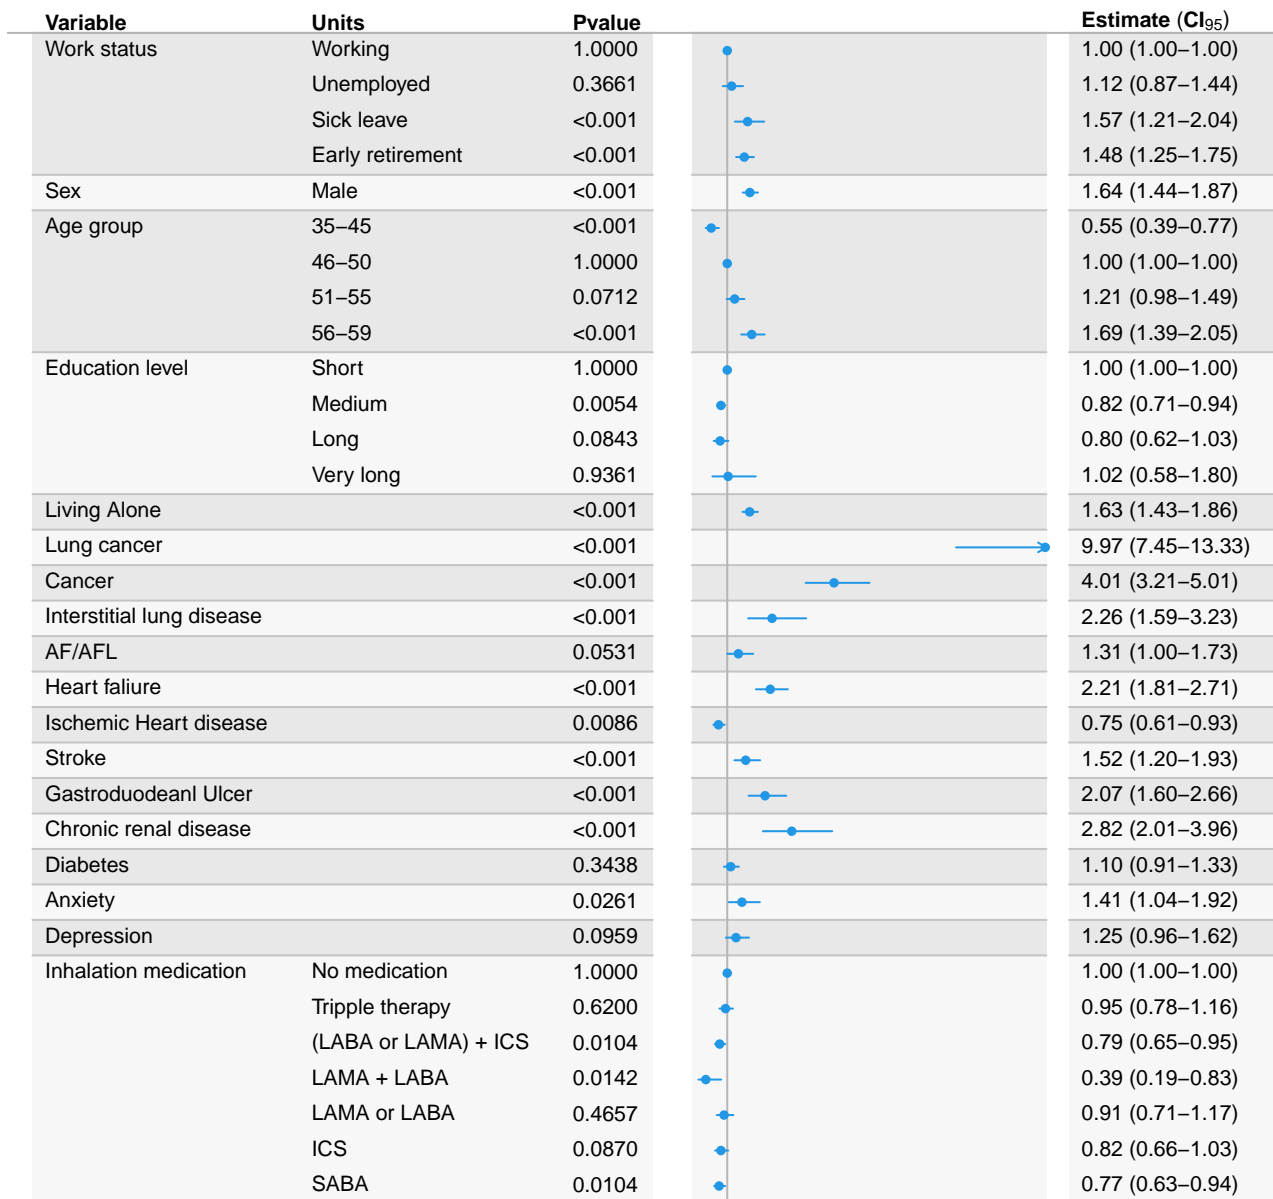

Figure S6. Multivariable logistic regression of 365-day mortality following first admission with AECOPD. All variables are included in one model. Abbreviations: AF = Atrial fibrillation, AFL = Atrial Flutter, LAMA = Long acting muscarinic antagonist, LABA = Long acting beta2 agonist, ICS = Inhaled corticosteroids, SABA = Short acting beta2 agonist
